# Supplementary material for: Exploring the adaptive mechanism of Camellia limonia in karst high calcium environment via an integrative analysis of metabolomics and metagenomics
Source: Research Square preprint supplement (doi:10.21203/rs.3.rs-135639/v1), 2021-01-08
Supplement: Supplementary file 1 [file 8baf622e5d1023bb70f2a72b.docx]

**Exploring the adaptive mechanism of *Camellia limonia* in karst high calcium environment via an integrative analysis of metabolomics and metagenomics**

Chunni Liu1#, Yang Huang2#, Feng Wu1, Wenjing Liu1, Yiqiu Ning1, Zhenrong Huang1, Yu Liang1*

1, Key Laboratory of Ecology of Rare and Endangered Species and Environmental Protection, College of Life Science, Guangxi Normal University, Guilin, China

2, School of Mechanical and Electrical Engineering, Guilin University of Electronic Technology, Guilin, China

* Correspondence author:

Email: Liangyu@gxnu.edu.cn

**Supplementary Information**

**Figure S1 The characters of *Camellia*s plant soil under high calcium stress.** A: Soil pH. B: Humidity of soil. C: Temperature of soil. D: Nitrogen content of soil. E: Potassium content of the soil. F: Phosphorus content of the soil. All the results are represented as the mean ± standard deviation (STD; n = 3). Statistically significant differences were determined using a two-tailed paired Student’s t-test compared with WT plants under similar conditions, and the results are indicated by **P < 0.01 and *P < 0.05.

**Figure S2** **Positive QA result graph and negative QA result graph.** QC samples are gathered and the repeatability is good, indicating that the system is stable. In the QC sample, the proportion of characteristic peaks with RSD<30% can reach 72.5% (72.8%), indicating that the data is good.

**Figure S3 Numbers of DE metabolites.** A represents 6422 metabolites of positive ion mode; B represents 2711 metabolites of negative ion mode.

**Figure S4** **Phylogenetic tree of soil metagenomics.** Circles can be classified as order family, genus andspecies from the outside to the inside. Each circle can be classified as the first class. The innermost class is up to the genus. The size of the loop represents the amount of content, the larger the loop, the greater the content. The three colors represent the subtrees that are important in the whole tree.

**Table S1 Summary table of the identified metabolites**

**Table S2 The main metabolic pathways**
