# Supplementary material for: Exploring the adaptive mechanism of Camellia limonia in karst high calcium environment via an integrative analysis of metabolomics and metagenomics
Source: Research Square preprint supplement (doi:10.21203/rs.3.rs-135639/v1), 2021-01-08
Supplement: Supplementary file 2 [file 95f5362389b603c5ed5d4832.xlsx]

## Sheet: Sheet1
Table s1 Summary table of 220 identified metabolites
	VIP	mean_Ning	sd_Ning	mean_Normal	sd_Normal	Fold Change_Ning/Normal	log2(FC_Ning/Normal)	p.value	FDR
(+)-Syringaresinol	1.481	1.81625e+06	1.47326e+06	3.51506e+07	2.52253e+07	0.052	-4.274	0.005	0.052
(-)-Matairesinol	1.299	1.38217e+07	8.05746e+06	3.21932e+08	1.87312e+08	0.043	-4.542	0.005	0.018
(13E)-11a-Hydroxy-9,15-dioxoprost-13-enoic acid	1.335	1.71574e+08	3.74999e+07	2.81289e+08	4.93665e+07	0.61	-0.713	0.008	0.025
(1H-Indol-3-yl)-N-methylmethanamine	1.176	4.38432e+07	1.40982e+07	2.08839e+08	1.25243e+08	0.21	-2.252	0.005	0.018
(2S,4S)-4-Hydroxy-2,3,4,5-tetrahydrodipicolinate	1.288	1.69191e+07	7.64581e+06	3.62338e+06	3.16436e+06	4.669	2.223	0.005	0.018
(3S,5S)-Carbapenam-3-carboxylic acid	1.289	1.27527e+07	1.42864e+07	7.52965e+07	3.611e+07	0.169	-2.562	0.005	0.018
(R)-3-Hydroxybutyric acid	1.371	4.66402e+06	1.44435e+06	2.0102e+07	7.91314e+06	0.232	-2.108	0.005	0.018
(R)-mandelic Acid	1.133	9.35477e+07	7.45454e+07	2.93416e+06	380718	31.882	4.995	0.005	0.018
(S)-Norlaudanine	1.095	1.65958e+08	7.27025e+07	7.11393e+07	3.99136e+07	2.333	1.222	0.045	0.091
1,2,3-Trihydroxybenzene	1.048	4.57144e+08	1.11977e+09	1.98802e+09	9.14183e+08	0.23	-2.121	0.025	0.06
1,2-Dihydroxy-3,4-epoxy-1,2,3,4-tetrahydronaphthalene	1.079	4.1641e+07	1.07261e+07	1.17947e+08	6.76548e+07	0.353	-1.502	0.005	0.018
1-Kestose	1.433	3.16574e+06	2.94659e+06	9.417e+06	4.10963e+06	0.336	-1.573	0.013	0.075
1-O-Galloyl-beta-D-glucose	1.573	2.13463e+07	1.33308e+07	1.5245e+08	8.60524e+07	0.14	-2.836	0.005	0.052
1-O-Sinapoyl-beta-D-glucose	1.235	1.17106e+06	763454	4.36593e+07	2.9258e+07	0.027	-5.22	0.005	0.018
10,11-Epoxy-3-geranylgeranylindole	1.564	1.89602e+07	4.17589e+06	1.15851e+08	2.51573e+07	0.164	-2.611	0.005	0.018
11-Deoxocucurbitacin I	1.157	164583	143744	7.57347e+06	5.85126e+06	0.022	-5.524	0.045	0.091
13(S)-HpOTrE	1.297	2.07354e+06	1.68203e+06	4.10119e+07	2.37626e+07	0.051	-4.306	0.005	0.018
19(R)-HETE	1.33	1.33569e+07	4.70231e+06	4.81895e+07	1.93125e+07	0.277	-1.851	0.005	0.018
2,3-Butanediol	1.199	1.03016e+08	4.71374e+07	3.26857e+07	2.11698e+07	3.152	1.656	0.031	0.067
2,4-Dinitrotoluene	1.262	5.86094e+07	2.95302e+07	1.104e+07	9.86095e+06	5.309	2.408	0.008	0.025
2,6-Dimethoxyphenol	1.158	5.29939e+07	6.89247e+06	1.22978e+08	5.47654e+07	0.431	-1.214	0.031	0.067
2-Acetamidoethylphosphonate	1.351	6.45602e+06	1.89721e+06	1.28347e+08	6.64847e+07	0.05	-4.313	0.005	0.018
2-Dehydrokanamycin A	1.159	5.43516e+07	2.03368e+07	1.6521e+08	8.47853e+07	0.329	-1.604	0.013	0.035
2-O-(alpha-D-Mannosyl)-D-glycerate	1.558	2.50188e+06	815283	6.10051e+06	2.306e+06	0.41	-1.286	0.008	0.06
2-trans,6-trans-Farnesal	1.238	9.75217e+07	3.05331e+07	1.61959e+08	3.18853e+07	0.602	-0.732	0.02	0.049
24-Methylenecycloartanol	1.413	2.71533e+06	1.58004e+06	8.70304e+07	3.95185e+07	0.031	-5.002	0.005	0.018
3,4-Dihydroxybenzaldehyde	1.08	6.9264e+07	3.84062e+07	1.89477e+07	2.36749e+07	3.655	1.87	0.02	0.049
3,4-Dihydroxyphenylglycol	1.052	7.26233e+06	5.95856e+06	2.77687e+07	1.82795e+07	0.262	-1.935	0.02	0.049
3-(2-Hydroxyphenyl)propanoic acid	1.112	1.14139e+07	5.62618e+06	4.32077e+07	3.8293e+07	0.264	-1.921	0.031	0.118
3-(3,4-Dihydroxyphenyl)pyruvate	1.227	1.18572e+07	6.44953e+06	3.45117e+07	1.44597e+07	0.344	-1.541	0.005	0.018
3-Geranylgeranylindole	1.586	5.12796e+06	1.52611e+06	2.78208e+08	6.16049e+07	0.018	-5.762	0.005	0.018
3-Hydroxymethylglutaric acid	1.573	4.66765e+08	2.31309e+08	1.1162e+08	4.55056e+07	4.182	2.064	0.045	0.15
3-Ketolactose	1.644	4.54171e+06	2.35669e+06	1.37591e+07	4.94485e+06	0.33	-1.599	0.005	0.052
3-Methyladenine	1.37	3.29752e+07	2.13996e+07	2.59957e+08	1.16586e+08	0.127	-2.979	0.005	0.018
3-Methylindole	1.152	1.39576e+07	2.04843e+06	2.31247e+07	7.01296e+06	0.604	-0.728	0.013	0.035
3beta,5beta-Ketotriol	1.639	3.15068e+06	678237	2.28963e+08	2.27372e+07	0.014	-6.183	0.005	0.018
4,5-Dihydroorotic acid	1.288	6.60363e+07	3.03762e+07	1.69129e+07	3.42384e+06	3.905	1.965	0.005	0.018
4-Guanidinobutanoic acid	1.427	1.35169e+08	3.44009e+07	3.1848e+08	7.53244e+07	0.424	-1.236	0.005	0.018
4-Hydroxyphenylpyruvic acid	1.841	2.85677e+07	9.40579e+06	3.52539e+06	3.46069e+06	8.103	3.018	0.005	0.052
4-Methylbenzoic acid	1.348	1.55291e+07	2.15813e+06	1.46896e+08	7.20797e+07	0.106	-3.242	0.005	0.018
4-Methylbenzyl alcohol	1.108	4.7208e+07	1.83334e+07	2.23094e+07	1.08849e+07	2.116	1.081	0.045	0.091
4-O-beta-D-Glucosyl-4-hydroxycinnamate	1.204	606403	290656	4.52531e+06	4.24393e+06	0.134	-2.9	0.005	0.052
5-Acetamidovalerate	1.388	1.62365e+07	4.42301e+06	6.06551e+07	2.17716e+07	0.268	-1.901	0.005	0.018
5-Hydroxyindoleacetic acid	1.475	3.00727e+08	2.76588e+07	1.46634e+08	1.14522e+08	2.051	1.036	0.045	0.15
5-O-beta-D-Glucosylpyridoxine	1.205	4.75574e+07	2.12526e+07	1.14826e+08	4.40698e+07	0.414	-1.272	0.013	0.035
5-S-Methyl-5-thioinosine	1.286	2.18956e+06	358933	3.06094e+07	1.77558e+07	0.072	-3.805	0.005	0.018
5a-Pregnane-3,20-dione	1.62	3.01112e+06	2.98284e+06	3.15515e+07	3.29192e+06	0.095	-3.389	0.005	0.018
6,8a-Seco-6,8a-deoxy-5-oxoavermectin 1b aglycone	1.565	2.06517e+06	281505	5.49159e+07	1.39007e+07	0.038	-4.733	0.005	0.018
6-Acetamido-3-oxohexanoate	1.503	1.26296e+07	7.06114e+06	5.14678e+07	1.17725e+07	0.245	-2.027	0.005	0.018
6-Hydroxyhexanoic acid	1.687	1.55823e+06	1.80481e+06	3.45781e+07	1.81574e+07	0.045	-4.472	0.008	0.06
6-Ketoprostaglandin E1	1.167	4.29241e+07	3.86787e+07	1.37458e+08	6.24197e+07	0.312	-1.679	0.02	0.049
6-O-Methyldeacetylisoipecoside	1.333	9.86752e+07	5.45454e+07	2.35427e+06	3.19042e+06	41.913	5.389	0.005	0.018
6-Tuliposide A	1.587	1.80256e+07	1.15333e+07	1.30887e+08	2.26677e+07	0.138	-2.86	0.005	0.018
6-Tuliposide B	1.543	9.74159e+06	3.9186e+06	6.5241e+07	3.83301e+07	0.149	-2.744	0.005	0.052
7-Aminomethyl-7-carbaguanine	1.246	1.54961e+07	1.1425e+07	5.68327e+07	2.54586e+07	0.273	-1.875	0.02	0.049
7-Methyladenine	1.364	9.16969e+06	1.3655e+06	3.40921e+07	1.31216e+07	0.269	-1.895	0.005	0.018
8-Amino-7-oxononanoate	1.246	5.83316e+06	6.57541e+06	1.74605e+07	4.27686e+06	0.334	-1.582	0.02	0.049
9-OxoODE	1.188	2.73246e+07	1.54997e+07	5.96531e+07	1.85736e+07	0.458	-1.126	0.02	0.049
Acetoin	1.261	1.18232e+07	1.0587e+07	3.59158e+07	1.1711e+07	0.329	-1.603	0.013	0.035
Aflatoxin B1	1.226	2.23761e+06	1.08798e+06	6.25012e+07	4.21819e+07	0.036	-4.804	0.005	0.018
Agnuside	1.271	232990	212329	7.91191e+06	7.66057e+06	0.029	-5.086	0.031	0.118
Aminocaproic acid	1.414	7.83873e+06	9.59326e+06	3.69628e+07	9.68776e+06	0.212	-2.237	0.008	0.025
Amygdalin	1.306	1.40226e+06	1.38205e+06	1.17621e+07	6.06525e+06	0.119	-3.068	0.005	0.018
Apigenin	1.317	482397	215505	3.68925e+07	2.13779e+07	0.013	-6.257	0.005	0.018
Astragalin	1.441	9.65498e+08	7.20359e+08	6.22596e+07	6.04912e+07	15.508	3.955	0.008	0.06
Aucubin	1.402	1.59765e+06	1.08426e+06	1.24876e+07	9.1171e+06	0.128	-2.966	0.008	0.06
Aurin	1.091	5.6753e+07	1.17223e+07	7.16192e+07	5.85604e+06	0.792	-0.336	0.013	0.035
Azelaic acid	1.359	1.17053e+07	6.75284e+06	3.506e+06	2.79539e+06	3.339	1.739	0.031	0.118
Benfuracarb	1.096	5.86387e+06	4.90878e+06	2.14288e+07	1.26754e+07	0.274	-1.87	0.008	0.025
beta-Isorenieratene	1.116	5.36127e+07	2.28593e+07	2.12896e+07	1.50304e+07	2.518	1.332	0.031	0.067
Betulin	1.348	1.72211e+07	1.06287e+07	5.33037e+07	1.6721e+07	0.323	-1.63	0.005	0.018
Bracteatin	1.111	658530	539342	2.14784e+07	1.77394e+07	0.031	-5.027	0.005	0.018
Butein	1.229	2.02587e+08	3.88685e+07	9.50021e+07	6.40342e+07	2.132	1.093	0.02	0.049
Catechin	1.247	2.94667e+08	6.88555e+07	1.66903e+08	5.16825e+07	1.766	0.82	0.013	0.035
Chlorpromazine	1.404	9.99829e+06	1.08282e+07	9.49108e+07	3.93206e+07	0.105	-3.247	0.005	0.018
Cholesterol sulfate	1.31	1.33747e+06	362624	5.63345e+07	3.27766e+07	0.024	-5.396	0.005	0.018
Choline sulfate	1.507	9.11272e+06	2.86316e+06	780019	438580	11.683	3.546	0.005	0.018
cis-4,5-Dihydroxy-4,5-dihydropyrene	1.098	7.77072e+07	2.45838e+07	3.883e+07	2.32864e+07	2.001	1.001	0.045	0.091
cis-4-Hydroxy-L-proline	1.123	3.99185e+07	1.09059e+07	2.09178e+07	1.15314e+07	1.908	0.932	0.013	0.035
Coniferyl alcohol	1.235	1.14164e+07	4.51768e+06	3.54583e+07	1.59304e+07	0.322	-1.635	0.045	0.091
Coniferyl aldehyde	1.439	1.24324e+07	8.38057e+06	5.3291e+07	1.57955e+07	0.233	-2.1	0.005	0.018
Coumarin	1.398	1.71736e+08	6.57767e+07	4.22785e+08	1.03417e+08	0.406	-1.3	0.005	0.018
Creatinine	1.104	4.23434e+07	6.90804e+07	3.38136e+08	2.45456e+08	0.125	-2.997	0.013	0.035
Cucurbitacin C	1.275	2.87569e+07	1.77132e+07	1.01295e+06	549775	28.389	4.827	0.005	0.018
Cucurbitacin E	1.248	1.44194e+08	7.69008e+07	2.05511e+07	3.15139e+07	7.016	2.811	0.008	0.025
Cyanidin 3-glucoside	1.151	2.48802e+07	1.65018e+07	8.04961e+07	4.11844e+07	0.309	-1.694	0.02	0.049
Cyanidin 3-O-(6-O-p-coumaroyl)glucoside-5-O-glucoside	1.448	3.19927e+09	5.98961e+08	1.22922e+09	5.87449e+08	2.603	1.38	0.005	0.018
Cyclopentanone	1.484	6.80704e+07	2.36348e+07	4.51866e+06	4.68853e+06	15.064	3.913	0.005	0.018
D-4-Hydroxyphenylglycine	1.101	1.17114e+07	5.60415e+06	4.20142e+06	3.3074e+06	2.788	1.479	0.02	0.049
D-4-Phosphopantothenate	1.272	2.13036e+07	1.0038e+07	8.16483e+06	8.38622e+06	2.609	1.384	0.045	0.15
D-Arabitol	1.827	1.43124e+06	378800	2.33267e+07	9.07661e+06	0.061	-4.027	0.005	0.052
D-Fructose	1.499	1.08176e+07	6.00045e+06	4.02642e+07	2.09286e+07	0.269	-1.896	0.008	0.06
D-Gal alpha 1->6D-Gal alpha 1->6D-Glucose	1.261	2.93196e+07	1.51703e+07	8.00102e+06	1.5297e+07	3.664	1.874	0.045	0.15
D-Lysine	1.201	3.01399e+07	2.51818e+07	9.05549e+07	3.63049e+07	0.333	-1.587	0.02	0.049
D-Maltose	1.323	617031	301361	1.35587e+07	7.48741e+06	0.046	-4.458	0.005	0.018
D-Psicose	1.017	2.02256e+06	737187	2.79749e+07	2.57259e+07	0.072	-3.79	0.005	0.018
Dattelic acid	1.261	9.27982e+06	1.90065e+06	1.40906e+07	2.51523e+06	0.659	-0.603	0.005	0.018
Dehydroepiandrosterone	1.416	1.66959e+07	4.13624e+06	3.57584e+07	7.84729e+06	0.467	-1.099	0.005	0.018
Delphinidin	1.054	5.97167e+07	4.68564e+07	2.40336e+08	1.624e+08	0.248	-2.009	0.013	0.035
Delphinidin 3-rutinoside	1.237	1.39502e+07	1.87751e+07	5.91747e+07	2.46925e+07	0.236	-2.085	0.013	0.035
Deoxyloganin	1.323	1.61336e+07	7.48721e+06	3.26536e+07	5.97196e+06	0.494	-1.017	0.008	0.025
Diacetyl	1.433	2.33055e+07	2.94607e+06	6.04399e+07	1.62565e+07	0.386	-1.375	0.005	0.018
Diaminopimelic acid	1.337	2.3019e+07	5.36856e+06	4.61434e+07	1.18569e+07	0.499	-1.003	0.008	0.025
Dicumarol	1.206	5.4476e+06	5.07277e+06	2.39644e+07	1.93895e+07	0.227	-2.137	0.045	0.15
DL-Dopa	1.313	1.01755e+06	396845	9.53159e+06	5.02286e+06	0.107	-3.228	0.005	0.018
Docosahexaenoic acid	1.249	1.07169e+07	1.05254e+07	5.55172e+07	2.81769e+07	0.193	-2.373	0.013	0.035
Docosapentaenoic acid (22n-3)	1.041	1.02051e+08	7.61096e+07	2.1234e+07	1.29359e+07	4.806	2.265	0.045	0.091
Ectoine	1.504	5.94936e+07	2.35608e+07	1.58145e+08	2.54937e+07	0.376	-1.41	0.005	0.018
Epicatechin	1.103	2.23567e+10	5.9887e+09	1.05448e+10	8.25914e+09	2.12	1.084	0.045	0.091
Epinephrine	1.009	9.08118e+06	1.91394e+06	3.04781e+07	2.14158e+07	0.298	-1.747	0.005	0.018
epsilon-Caprolactone	1.385	7.39104e+06	7.85037e+06	2.98348e+07	8.14771e+06	0.248	-2.013	0.008	0.025
Eriodictyol	1.12	2.52235e+06	1.77778e+06	6.91104e+06	3.23238e+06	0.365	-1.454	0.02	0.049
Erucic acid	1.231	3.22209e+07	1.22181e+07	5.53141e+07	1.03753e+07	0.583	-0.78	0.013	0.035
Etherolenic acid	1.044	3.99656e+07	4.03992e+07	1.14904e+08	5.86878e+07	0.348	-1.524	0.045	0.091
Eugenol	1.444	7.80751e+06	6.17501e+06	3.26211e+07	8.71502e+06	0.239	-2.063	0.005	0.018
Flavonol 3-O-beta-D-glucosyl-(1->2)-beta-D-glucoside	1.209	1.09164e+07	1.01288e+07	5.81894e+07	3.25449e+07	0.188	-2.414	0.045	0.091
gamma-Aminobutyric acid	1.12	4.90545e+09	1.4648e+09	8.08774e+09	2.23738e+09	0.607	-0.721	0.02	0.049
gamma-L-Glutamyl-D-alanine	1.272	9.58557e+06	4.74928e+06	1.72264e+06	1.70184e+06	5.564	2.476	0.008	0.025
Gamma-Linolenic acid	1.274	8.8434e+06	5.16837e+06	5.04313e+07	2.60724e+07	0.175	-2.512	0.005	0.018
Genistin	1.234	5.05484e+08	7.47022e+07	3.07165e+08	1.14537e+08	1.646	0.719	0.013	0.035
Gentisic acid	1.573	4.15055e+06	4.69286e+06	2.24113e+07	1.11841e+07	0.185	-2.433	0.02	0.094
Glutaric acid	1.202	4.49003e+07	1.77645e+07	1.25452e+08	8.58235e+07	0.358	-1.482	0.008	0.06
Glyceric acid	1.006	2.40446e+06	1.48076e+06	4.0646e+07	3.85587e+07	0.059	-4.079	0.008	0.025
Guanine	1.197	3.03324e+07	1.94019e+07	8.02076e+07	3.12564e+07	0.378	-1.403	0.013	0.035
Homoeriodictyol chalcone	1.193	1.07036e+08	3.32595e+07	5.20861e+07	2.36141e+07	2.055	1.039	0.031	0.067
Homogentisic acid	1.188	1.20702e+08	2.7297e+07	2.26683e+08	7.44655e+07	0.532	-0.909	0.02	0.049
Hydroquinone	1.256	1.09033e+09	4.21112e+08	3.4624e+08	2.56501e+08	3.149	1.655	0.005	0.018
Hydroxykynurenine	1.078	4.74186e+07	8.58666e+06	3.11604e+07	1.18351e+07	1.522	0.606	0.031	0.067
Indol-3-ylacetyl-myo-inositol L-arabinoside	1.628	2.61647e+07	1.18284e+07	4.3378e+06	6.10219e+06	6.032	2.593	0.008	0.06
Indole	1.23	1.2226e+08	1.55359e+07	1.68522e+08	2.81408e+07	0.725	-0.463	0.008	0.025
Indole-3-acetyl-myo-inositol	1.539	638312	211068	9.67138e+06	6.30742e+06	0.066	-3.921	0.005	0.052
Indole-3-carboxylic acid	1.153	8.92046e+06	2.2142e+06	3.16999e+07	1.7981e+07	0.281	-1.829	0.005	0.018
Indolelactic acid	1.384	3.0214e+06	3.79722e+06	1.05312e+08	5.15419e+07	0.029	-5.123	0.005	0.018
Isoalantolactone	1.313	3.48938e+07	1.84685e+07	8.29662e+07	2.16087e+07	0.421	-1.25	0.008	0.025
Isoeugenol	1.287	4.37843e+07	1.09095e+07	9.29763e+07	2.86903e+07	0.471	-1.086	0.008	0.025
Isoquercitrin	1.291	9.78261e+06	9.83833e+06	5.87512e+07	2.86649e+07	0.167	-2.586	0.005	0.018
Isovaleryl-CoA	1.356	1.39709e+06	2.2324e+06	1.26653e+07	5.65765e+06	0.11	-3.18	0.005	0.018
Isovitexin	1.101	2.80551e+08	3.18615e+07	1.98246e+08	6.38186e+07	1.415	0.501	0.02	0.049
Isovitexin 2-O-beta-D-glucoside	1.26	1.43453e+06	810981	1.24025e+08	8.06031e+07	0.012	-6.434	0.005	0.018
Jasmonic acid	1.268	6.20912e+06	6.15097e+06	2.77637e+07	1.25108e+07	0.224	-2.161	0.008	0.025
Kaempferol	1.336	7.17037e+07	4.86656e+07	1.58665e+07	1.62102e+07	4.519	2.176	0.031	0.118
Kaempferol-3-O-rutinoside	1.89	1.423e+10	4.93591e+09	3.74492e+07	4.80054e+07	379.98	8.57	0.005	0.052
Kanamycin B	1.136	5.28991e+06	3.77292e+06	1.21807e+07	4.19301e+06	0.434	-1.203	0.02	0.049
L-Arginine	1.16	2.16109e+07	1.20582e+07	5.23524e+06	4.48442e+06	4.128	2.045	0.013	0.035
L-Glutamic acid 5-phosphate	1.276	347698	315614	1.5014e+07	9.33577e+06	0.023	-5.432	0.005	0.018
L-Lactic acid	1.088	8.32069e+06	6.98845e+06	2.62205e+07	1.42334e+07	0.317	-1.656	0.031	0.067
L-Malic acid	1.553	4.73989e+06	1.09881e+06	2.57225e+07	1.43058e+07	0.184	-2.44	0.005	0.052
L-Rhamnono-1,4-lactone	1.018	3.06801e+07	1.02003e+07	4.50747e+07	9.9661e+06	0.681	-0.555	0.045	0.091
Leucodopachrome	1.465	4.17731e+07	9.34587e+06	1.53393e+08	4.41166e+07	0.272	-1.877	0.005	0.018
Leukotriene E4	1.065	235948	148458	7.62986e+06	6.79716e+06	0.031	-5.015	0.005	0.018
Limonene-1,2-diol	1.016	3.51442e+07	2.12933e+07	1.88875e+08	1.51156e+08	0.186	-2.426	0.013	0.035
Lithocholyltaurine	1.06	2.35793e+07	1.51564e+07	4.60304e+07	1.42476e+07	0.512	-0.965	0.031	0.067
m-Coumaric acid	1.469	1.31963e+07	4.36042e+06	1.09028e+08	3.79971e+07	0.121	-3.046	0.005	0.018
m-Cresol	1.467	3.36233e+06	815262	3.39421e+07	1.22519e+07	0.099	-3.336	0.005	0.018
Mannitol	1.193	1.81269e+07	2.06689e+07	5.9217e+07	2.24404e+07	0.306	-1.708	0.013	0.035
Maslinic acid	1.282	1.04558e+08	5.35022e+07	3.13463e+09	1.90707e+09	0.033	-4.906	0.005	0.018
Melphalan	1.209	9.10201e+06	3.16678e+06	1.55202e+07	3.37769e+06	0.586	-0.77	0.02	0.049
Messagenin	1.188	3.19907e+07	8.37643e+06	1.84755e+08	1.14153e+08	0.173	-2.53	0.005	0.018
Methyl beta-D-galactoside	1.188	4.67359e+06	1.97459e+06	2.12851e+06	2.00933e+06	2.196	1.135	0.045	0.15
Methyl farnesoate	1.341	2.8254e+06	1.77899e+06	3.48721e+07	1.7792e+07	0.081	-3.626	0.005	0.018
Myclobutanil	1.503	1.0568e+08	2.58261e+07	3.05108e+07	6.45341e+06	3.464	1.792	0.005	0.018
myo-Inositol	1.535	1.93787e+08	2.39273e+07	1.45446e+08	2.41073e+07	1.332	0.414	0.013	0.075
Myristic acid	1.209	223325	184626	2.95227e+07	2.11336e+07	0.008	-7.046	0.005	0.018
N-(4-Coumaroyl)-L-homoserine lactone	1.331	1.65785e+07	3673984	6.7862e+07	2.90153e+07	0.244	-2.033	0.005	0.018
N-Acetylglutamic acid	1.236	4.33631e+06	2.32687e+06	1.45146e+07	6.59214e+06	0.299	-1.743	0.02	0.049
N-Acetylhistidine	1.321	5.02905e+06	987193	8.13454e+08	4.70257e+08	0.006	-7.338	0.005	0.018
N-Acetylputrescine	1.133	7.19063e+06	5.80071e+06	6.29051e+07	4.5444e+07	0.114	-3.129	0.008	0.025
N-Acetylthienamycin	1.137	4.36035e+07	6.58011e+06	1.48935e+08	8.58317e+07	0.293	-1.772	0.031	0.067
Naringin	1.132	2.84903e+07	1.51482e+07	6.91708e+08	7.87488e+08	0.041	-4.602	0.045	0.15
Nebularine	1.399	3.1924e+06	3.16112e+06	2.26103e+08	1.085e+08	0.014	-6.146	0.005	0.018
Neocnidilide	1.237	3.51379e+06	1.72084e+06	4.64912e+07	2.94165e+07	0.076	-3.726	0.005	0.018
Nicotinic acid	1.2	3.02322e+07	4.64488e+06	6.44944e+07	2.46765e+07	0.469	-1.093	0.013	0.035
Norepinephrine	1.078	1.66192e+08	5.15104e+07	8.748e+07	4.86354e+07	1.9	0.926	0.031	0.067
O-Succinyl-L-homoserine	1.342	1.18107e+07	5.90473e+06	3.8081e+07	1.33769e+07	0.31	-1.689	0.005	0.018
o-Xylene	1.041	2.38315e+06	756386	2.85128e+07	2.49191e+07	0.084	-3.581	0.005	0.018
Oleanolic acid	1.186	3.84321e+07	3.67807e+07	1.63759e+08	8.6668e+07	0.235	-2.091	0.005	0.018
Oleanolic aldehyde	1.274	1.41468e+07	2.43924e+07	1.22063e+08	6.45861e+07	0.116	-3.109	0.008	0.025
Oleuropein aglycone	1.583	7.63738e+06	6.28991e+06	2.84865e+07	1.21044e+07	0.268	-1.899	0.02	0.094
Oxoglutaric acid	1.377	1.31887e+07	5.19887e+06	2.68106e+07	1.06573e+07	0.492	-1.024	0.031	0.118
Pantothenic acid	1.018	5.88914e+08	1.63686e+08	1.96999e+09	1.35809e+09	0.299	-1.742	0.005	0.018
Pelargonic acid	1.282	1.98798e+08	1.17274e+07	2.94548e+08	5.91605e+07	0.675	-0.567	0.005	0.018
Pelargonin	1.553	1.3274e+07	9.66604e+06	1.72664e+09	4.81766e+08	0.008	-7.023	0.005	0.018
Pentaporphyrin I	1.323	8.68113e+07	2.88187e+07	3.70033e+08	1.61555e+08	0.235	-2.092	0.005	0.018
Peonidin-3-glucoside	1.101	765610	238987	8.14478e+07	6.98976e+07	0.009	-6.733	0.005	0.018
Phenyl acetate	1.231	1.29804e+08	8.23177e+07	1.10189e+07	4.63313e+06	11.78	3.558	0.005	0.018
Phenylacetic acid	1.499	2.65348e+07	7.02202e+06	6.40074e+07	1.14747e+07	0.415	-1.27	0.005	0.018
Phenylethylamine	1.578	2.16203e+08	1.00391e+08	4.75802e+07	4.79233e+07	4.544	2.184	0.008	0.06
Phloretin	1.321	9.69701e+07	2.87786e+07	4.28944e+07	1.26876e+07	2.261	1.177	0.005	0.018
Porphobilinogen	1.431	1.31085e+08	2.26283e+07	1.95871e+08	1.81133e+07	0.669	-0.579	0.005	0.018
Propionylcarnitine	1.18	9.31138e+06	3.7486e+06	1.94155e+07	6.69417e+06	0.48	-1.06	0.031	0.067
Prostaglandin D2	1.016	5.20608e+07	4.75829e+07	1.19358e+08	4.70067e+07	0.436	-1.197	0.045	0.091
Prostaglandin E1	1.037	1.55162e+07	5.56006e+06	4.39396e+07	2.67259e+07	0.353	-1.502	0.013	0.035
Prostaglandin E3	1.033	5.10927e+06	4.31459e+06	1.24489e+07	5.63745e+06	0.41	-1.285	0.02	0.049
Prunasin	1.645	4.93342e+07	2.93671e+07	1.47624e+08	5.03878e+07	0.334	-1.581	0.005	0.052
Pyroglutamic acid	1.149	1.10913e+08	3.66689e+07	2.65404e+08	1.1813e+08	0.418	-1.259	0.013	0.035
Quadrone	1.239	1.95947e+07	1.46663e+07	8.5466e+07	4.25297e+07	0.229	-2.125	0.005	0.018
Quinolin-2-ol	1.15	5.07637e+07	1.20538e+07	7.75639e+07	1.77027e+07	0.654	-0.612	0.02	0.049
Raffinose	1.321	2.65021e+06	3.42444e+06	2.05861e+07	1.64311e+07	0.129	-2.958	0.013	0.075
Ribitol	1.27	4.93954e+06	334057	1.89331e+07	9.01866e+06	0.261	-1.938	0.005	0.018
Scopoletin	1.534	1.46178e+07	2.39179e+06	3.19532e+07	4.81647e+06	0.457	-1.128	0.005	0.018
Sophoradiol	1.59	3.20443e+07	6.73058e+06	1.3564e+06	328707	23.624	4.562	0.005	0.018
Soyasapogenol A	1.21	5.98237e+06	5.10344e+06	3.63542e+07	2.12766e+07	0.165	-2.603	0.013	0.035
Soyasapogenol E	1.254	4.68492e+07	2.31731e+07	2.30938e+08	1.20038e+08	0.203	-2.301	0.005	0.018
Sucrose	1.493	8.64254e+06	4.13806e+06	4.85591e+07	2.94653e+07	0.178	-2.49	0.013	0.075
Syringin	1.205	4.28706e+06	1.99865e+06	1.8748e+07	1.03176e+07	0.229	-2.129	0.005	0.018
trans-Cinnamoyl beta-D-glucoside	1.515	1.78023e+07	2.80213e+06	7.3242e+07	1.84812e+07	0.243	-2.041	0.005	0.018
trans-Ferulic acid	1.355	2.93547e+07	1.42896e+07	1.70616e+08	7.50028e+07	0.172	-2.539	0.005	0.018
Triethylamine	1.164	7.50824e+07	2.0244e+07	4.23178e+07	1.56174e+07	1.774	0.827	0.013	0.035
Tyramine	1.422	2.20621e+07	4.38218e+06	5.86932e+07	1.62296e+07	0.376	-1.412	0.005	0.018
Tyrosol	1.435	4.67655e+08	2.04495e+08	5.36223e+06	1.32737e+06	87.213	6.447	0.005	0.018
Ubiquinone-1	1.525	1.06624e+08	2.30772e+07	2.66085e+07	1.17186e+07	4.007	2.003	0.005	0.018
UCL 1608	1.071	2.68191e+07	1.31802e+07	1.31605e+08	9.44991e+07	0.204	-2.295	0.008	0.025
UDP-4-amino-4,6-dideoxy-N-acetyl-beta-L-altrosamine	1.085	3.57055e+07	2.23855e+07	8.05839e+06	1.01942e+07	4.431	2.148	0.013	0.035
Undecanoic acid	1.273	5.71863e+07	1.5388e+07	3.06732e+07	7.17665e+06	1.864	0.899	0.02	0.049
Uridine	1.095	2.84524e+07	2.33039e+07	7.53242e+07	5.35076e+07	0.378	-1.405	0.045	0.15
Urocanic acid	1.575	2.36811e+07	1.46782e+07	6.98727e+07	2.68532e+07	0.339	-1.561	0.008	0.06
Vanillylmandelic acid	1.483	2.40986e+07	5.9991e+06	6.69862e+07	1.52052e+07	0.36	-1.475	0.005	0.018
Vanylglycol	1.368	1.038e+08	4.21885e+07	2.99355e+08	9.35808e+07	0.347	-1.528	0.005	0.018
Xanthurenic acid	1.194	4.21603e+06	2.87096e+06	1.9376e+07	1.08689e+07	0.218	-2.2	0.005	0.018
