# Supplementary material for: Exploring the adaptive mechanism of Camellia limonia in karst high calcium environment via an integrative analysis of metabolomics and metagenomics
Source: Research Square preprint supplement (doi:10.21203/rs.3.rs-135639/v1), 2021-01-08
Supplement: Supplementary file 3 [file a06b9ff58ea5f376e29aad1f.xlsx]

## Sheet: Sheet1
Table S3 42 Pathways
	Total	Hits	Raw p	-LOG(p)	Holm adjust	FDR	Impact	compounds	pathway
Flavone and flavonol biosynthesis	9	4	0.051375	2.9686	1	1	0.56	C05903;C01477;C05623;C12249	ath00944
Isoquinoline alkaloid biosynthesis	6	3	0.065904	2.7196	1	1	0	C00355;C01179;C00483	ath00950
Anthocyanin biosynthesis	8	3	0.14211	1.9512	1	1	0	C08604;C12096;C08725	ath00942
Tyrosine metabolism	18	5	0.17989	1.7154	1	1	0.63637	C05576;C00355;C00544;C01179;C00483	ath00350
Flavonoid biosynthesis	43	8	0.45757	0.78183	1	1	0.04254	C05903;C05908;C05631;C01477;C08578;C10434;C09727;C16405	ath00941
Galactose metabolism	26	5	0.46498	0.76576	1	1	0.08877	C05404;C00492;C00089;C00095;C00137	ath00052
Biotin metabolism	5	1	0.60864	0.49653	1	1	1	C01092	ath00780
Phenylalanine metabolism	8	1	0.77752	0.25165	1	1	0.16667	C05332	ath00360
Phenylpropanoid biosynthesis	45	6	0.80856	0.21249	1	1	0.17385	C02666;C00590;C01494;C01175;C10434;C01533	ath00940
Lysine biosynthesis	10	1	0.84745	0.16552	1	1	0.16667	C00666	ath00300
Stilbenoid, diarylheptanoid and gingerol biosynthesis	10	1	0.84745	0.16552	1	1	0	C10434	ath00945
Citrate cycle (TCA cycle)	20	2	0.88107	0.12662	1	1	0.10521	C00026;C00149	ath00020
beta-Alanine metabolism	12	1	0.89547	0.11041	1	1	0	C00864	ath00410
Nicotinate and nicotinamide metabolism	12	1	0.89547	0.11041	1	1	0	C00253	ath00760
Sulfur metabolism	12	1	0.89547	0.11041	1	1	0	C01118	ath00920
Pyruvate metabolism	21	2	0.89765	0.10797	1	1	0.08561	C00149;C00186	ath00620
Phenylalanine, tyrosine and tryptophan biosynthesis	21	2	0.89765	0.10797	1	1	0	C00463;C01179	ath00400
Alanine, aspartate and glutamate metabolism	22	2	0.91207	0.092035	1	1	0.09195	C00026;C00334	ath00250
Arginine and proline metabolism	38	4	0.91214	0.091961	1	1	0.13004	C00062;C00624;C03287;C00334	ath00330
Glycerolipid metabolism	13	1	0.91349	0.090482	1	1	0	C00258	ath00561
alpha-Linolenic acid metabolism	23	2	0.92458	0.078418	1	1	0.23	C04785;C08491	ath00592
Ubiquinone and other terpenoid-quinone biosynthesis	23	2	0.92458	0.078418	1	1	0.19791	C01179;C00544	ath00130
Pantothenate and CoA biosynthesis	14	1	0.92842	0.074274	1	1	0.15	C00864	ath00770
Ascorbate and aldarate metabolism	15	1	0.94078	0.061047	1	1	0	C00137	ath00053
Biosynthesis of unsaturated fatty acids	42	4	0.94665	0.054827	1	1	0	C08316;C16513;C06426;C06429	ath01040
Fructose and mannose metabolism	16	1	0.95101	0.050227	1	1	0.07627	C00095	ath00051
Glyoxylate and dicarboxylate metabolism	17	1	0.95949	0.041358	1	1	0.15986	C00149	ath00630
Butanoate metabolism	18	1	0.9665	0.034075	1	1	0	C00334	ath00650
Starch and sucrose metabolism	30	2	0.97515	0.025165	1	1	0.10986	C00089;C00208	ath00500
Carbon fixation in photosynthetic organisms	21	1	0.98108	0.019105	1	1	0	C00149	ath00710
Inositol phosphate metabolism	24	1	0.98933	0.010731	1	1	0.25131	C00137	ath00562
Glycolysis or Gluconeogenesis	25	1	0.99118	0.0088547	1	1	0	C00186	ath00010
Glutathione metabolism	26	1	0.99272	0.0073066	1	1	0	C01879	ath00480
Pyrimidine metabolism	38	2	0.99342	0.0066053	1	1	0.05408	C00337;C00299	ath00240
Tryptophan metabolism	27	1	0.99399	0.0060291	1	1	0	C05635	ath00380
Porphyrin and chlorophyll metabolism	29	1	0.9959	0.0041042	1	1	0.01613	C00931	ath00860
Valine, leucine and isoleucine degradation	34	1	0.99843	0.0015664	1	1	0.06365	C02939	ath00280
Cysteine and methionine metabolism	34	1	0.99843	0.0015664	1	1	0.04808	C01118	ath00270
Steroid biosynthesis	36	1	0.99894	0.0010645	1	1	0	C08830	ath00100
Fatty acid biosynthesis	49	1	0.99991	8.51e-05	1	1	0	C06424	ath00061
Purine metabolism	61	1	0.99999	8.06e-06	1	1	0	C00242	ath00230
Aminoacyl-tRNA biosynthesis	67	1	1	2.46e-06	1	1	0	C00062	ath00970
